# Supplementary material for: Calcification response of a key phytoplankton family to millennial-scale environmental change
Source: PubMed Central journal article supplement (PMC5039703; doi:10.1038/srep34263), 2016-09-28
Supplement: srep34263-s1.pdf [file srep34263-s1.pdf]

# Supplement

## Calcification response of a key phytoplankton family to millennial-scale environmental change

H.L.O McClelland<sup>1</sup>, N. Barbarin<sup>2</sup>, L. Beaufort<sup>2</sup>, M. Hermoso<sup>1</sup>,  
P. Ferretti<sup>3,4</sup>, M. Greaves<sup>4</sup> & R.E.M. Rickaby<sup>1</sup>

1. Department of Earth Sciences, University of Oxford, South Parks Road, Oxford, OX1 3AN,  
UK

2. CEREGE CNRS-IRD-Aix Marseille Univ, Avenue Louis Philibert, BP80 13545 Aix en Provence  
cedex 04, France

3. Consiglio Nazionale delle Ricerche, Istituto per la Dinamica dei Processi Ambientali(CNR-  
IDPA), Calle, Larga Santa Marta 2137, Venice I-30123, Italy.

4. Godwin Laboratory for Palaeoclimate Research, Department of Earth Sciences, University of  
Cambridge, Downing Street, Cambridge CB2 3EQ, UK.

## 13 Supplementary Discussion

### 14 Coccolith to coccosphere relationships

15 Figure S1 shows the relationships between coccolith dimensions and coccosphere dimensions from  
16 our culture experiments. These relationships underpin our rationale. The strong relationship be-  
17 tween coccolith length ( $L_c$ ) and coccosphere diameter ( $D_s$ ) in the reticulofenestrids is established-  
18 Henderiks (2008):

$$D_s = 1.02 + 1.42L_c. \quad (\text{S1})$$

19 Given that,

$$A_c = \pi \left( \frac{L_c C}{2} \right)^2, \quad (\text{S2})$$

20 where  $A_c$  = coccolith area,  $W_c$  and  $L_c$  = respectively the semi minor and major axes of the  
21 elliptical coccolith and  $C = \sqrt{W_c/L_c}$  = "circularity", EqS1 becomes:

$$R_s = 0.51 + \frac{1.42}{\sqrt{\pi C}} \sqrt{A_c}. \quad (\text{S3})$$

22 When a value of  $C = 0.9$  is used, which is typical Henderiks (2008), the relationship we find  
23 between the square root of coccolith area and coccosphere radius is in very close agreement with  
24 EqS1. Equation S3 describes the red dashed line in Fig.1C. A more recently published relationship  
25 between coccolith length and coccosphere diameter, has a different gradient Müller *et al.* (2010),  
26 but the measurements of length are based on coccolith volume, related to distal shield length via  
27 an equation from the literature Young & Ziveri (2000) - not from direct measurements of area  
28 or length. Our direct measurement of and correlation between coccolith dimensions and molar  
29 PIC:POC, circumvents the complications associated with allometry and with multiple layers of  
30 coccoliths.

## 31 Other geological coccolith time series

32 Some geological time series of coccolith mass from the literature found a decrease in coccolith  
33 mass with increasing CO<sub>2</sub>Beaufort *et al.* (2011); Meier *et al.* (2014a), whilst others found the  
34 oppositeIglesias-Rodriguez *et al.* (2008); Meier *et al.* (2014b). Increasing coccolith mass in the  
35 absence of area changes would be expected to correspond to an increase in coccolithophore PIC:POC  
36 according to Eq. 3. It is possible that these contrasting conclusions may be reconciled when  
37 PIC:POC rather than coccolith mass alone is considered. Unfortunately the data from these studies  
38 are not appropriate for this analysis. The earlier version of SYRACO used in these studiesBeaufort  
39 *et al.* (2011); Meier *et al.* (2014a,b) yielded significant underestimates of coccolith area, especially  
40 for *E. huxleyi*, and overestimates of coccolith thickness, rendering the estimation of PIC:POC  
41 somewhat insensitive to changes in coccolith area. Improvements in the version of SYRACO used  
42 in this studyBeaufort *et al.* (2014), are an increased resolution camera, higher magnification lens  
43 and images taken in triplicate at different angles to remove the extinction cross. Coccolith volume  
44 aloneIglesias-Rodriguez *et al.* (2008) is inappropriate because estimates of PIC:POC using Eq.3  
45 necessitate decoupling volume into thickness and area.

## 46 Supplementary figures

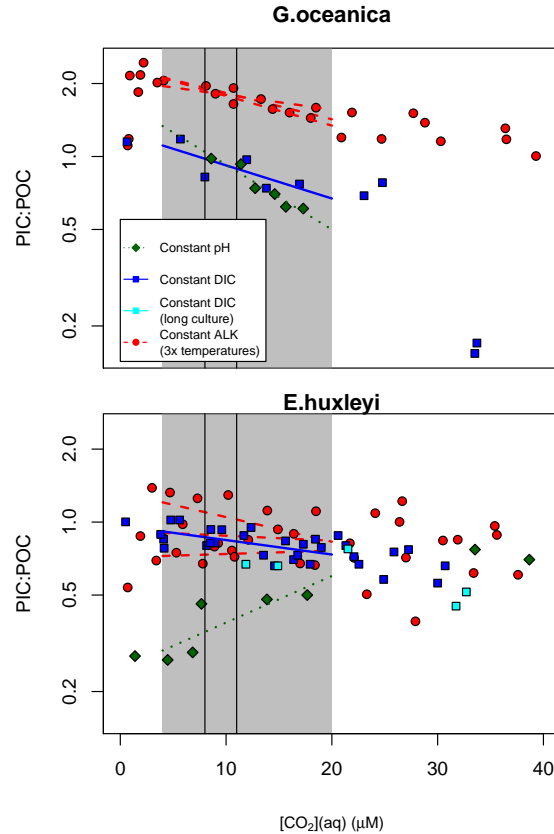

**Figure 1: (S1): Plastic response of *E. huxleyi* and *G. oceanica* from the literature.** Least-squares linear regressions for each method of carbon manipulation are shown, over a representative range of  $[\text{CO}_2(\text{aq})]$  (grey shaded region). The solid vertical lines delimit the range of  $[\text{CO}_2(\text{aq})]$  experienced at ODP site 1123 over the glacial terminations. Three separate regressions are given within the const.ALK experiments, for three experiments undertaken at different temperatures. Slopes are based on the  $\sim 4\text{-}20\mu\text{M}$  range of  $[\text{CO}_2]$ , to capture the linear part of the response, representative of the  $[\text{CO}_2(\text{aq})]$  range  $\sim 8\text{-}11\mu\text{M}$ . *E. huxleyi* data from Bach *et al.* (2011); Iglesias-Rodriguez *et al.* (2008); Langer *et al.* (2009); Müller *et al.* (2010); Sett *et al.* (2014); Zondervan *et al.* (2001) and Riebesell *et al.* (2000), and *G. oceanica* data taken from Rickaby *et al.* (2010); Sett *et al.* (2014); Zondervan *et al.* (2001) and Riebesell *et al.* (2000)). Nb: The constant alkalinity *E. huxleyi* (15°C) data from Bach *et al.* (2011) is the same as that of Sett *et al.* (2014) so has been omitted.

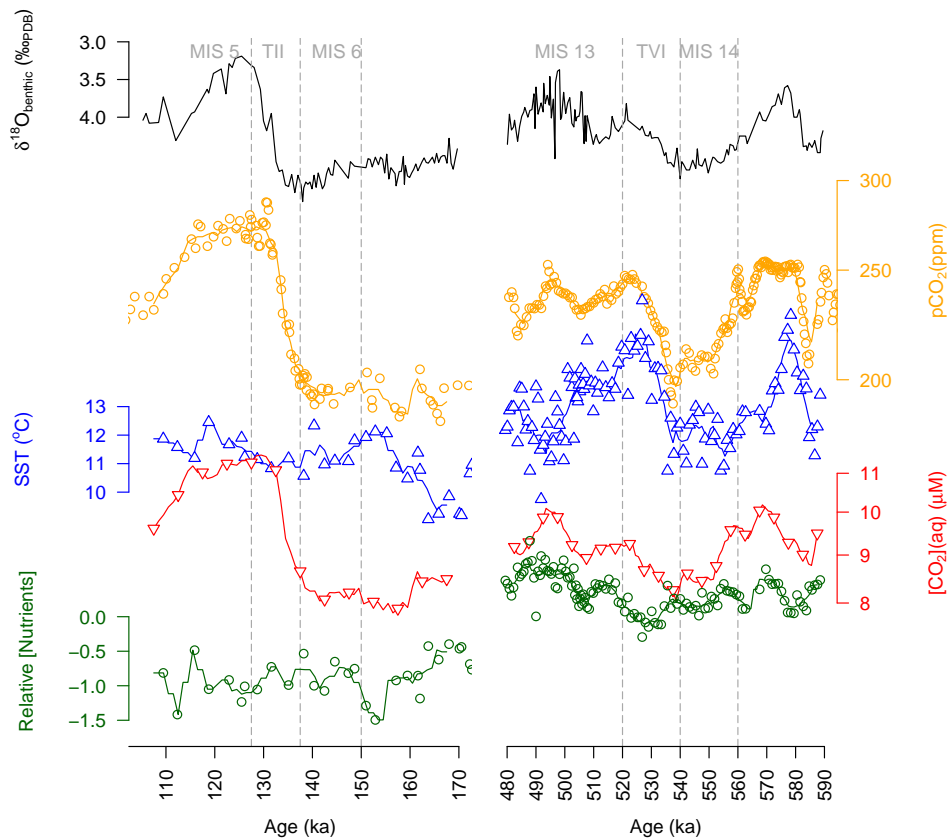

**Figure 2: (S2) Time series of proxy-reconstructed climatic parameters at ODP site 1123.** Benthic Oxygen isotopes from forams Elderfield *et al.* (2012) allow for temporal alignment with other records. Reconstructed sea surface temperature (SST) estimates are based on Mg/Ca ratios of planktic forams (see methods).  $[\text{CO}_2]_{\text{(aq)}}$  is estimated from global  $\text{pCO}_2$  of an assumed well mixed atmosphere from Vostok (*left*) and Dome C (*right*) Antarctic ice cores (compiled by Lüthi *et al.* (2008)), with dissolution assumed to be controlled only by SST at a constant salinity of 35. EDC3 gas age was converted to LR04 using a published conversion Parrenin *et al.* (2007). Carbon isotopic composition of planktic forams were used as a rough proxy for relative nutrient availability corrected for the effect of temperature (see methods).

47 Regression data - fitted histograms (Fig.S3 to Fig.S10)

48 To discount noise from the lower end of some of the mass and area size spectra, which is due to  
49 the occasional presence of coccolith fragments, and is an often unavoidable consequence of making  
50 smear slides, the values of coccolith morphometrics were found by independently fitting a gaussian  
51 curve to each spectrum. The histograms responsible for the data shown in Figure 1B are presented  
52 in FigsS4 to S11.

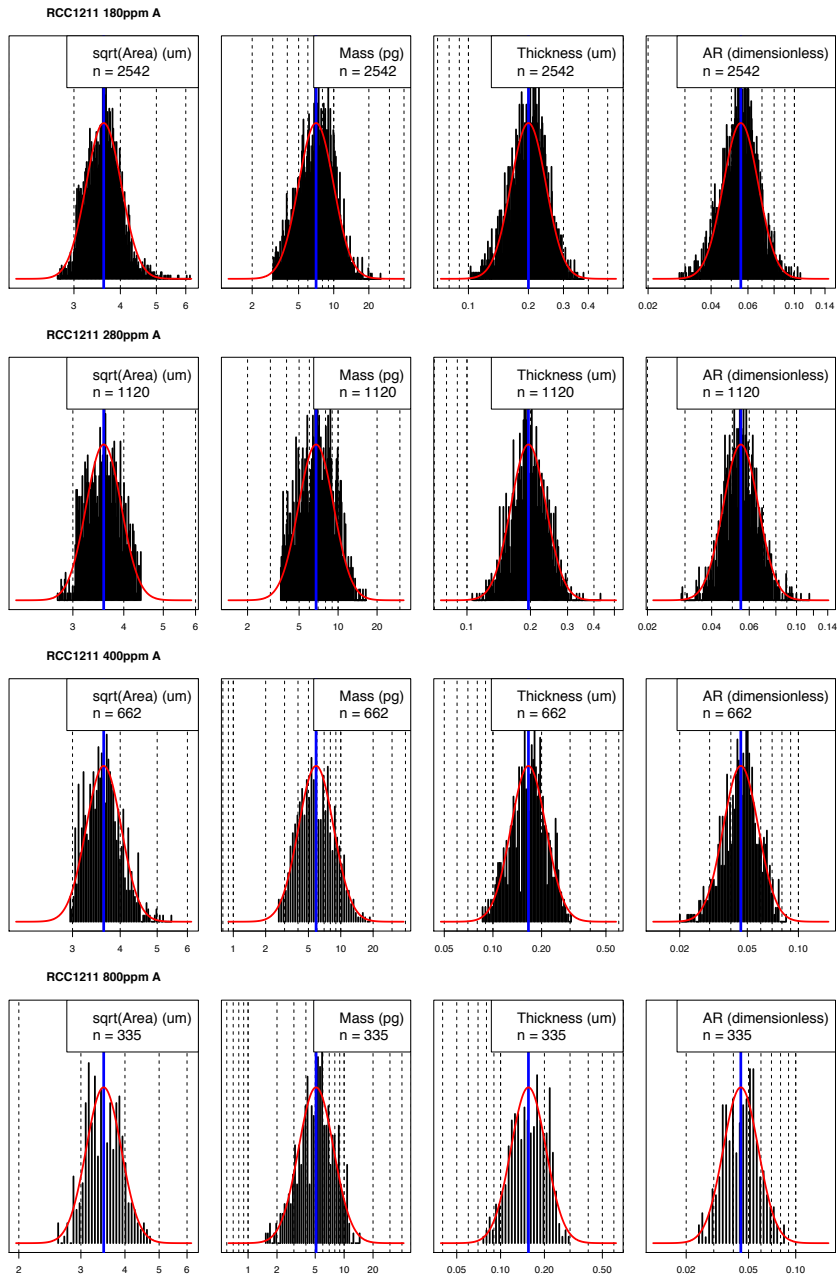

Figure 3: S3: Histograms (1)

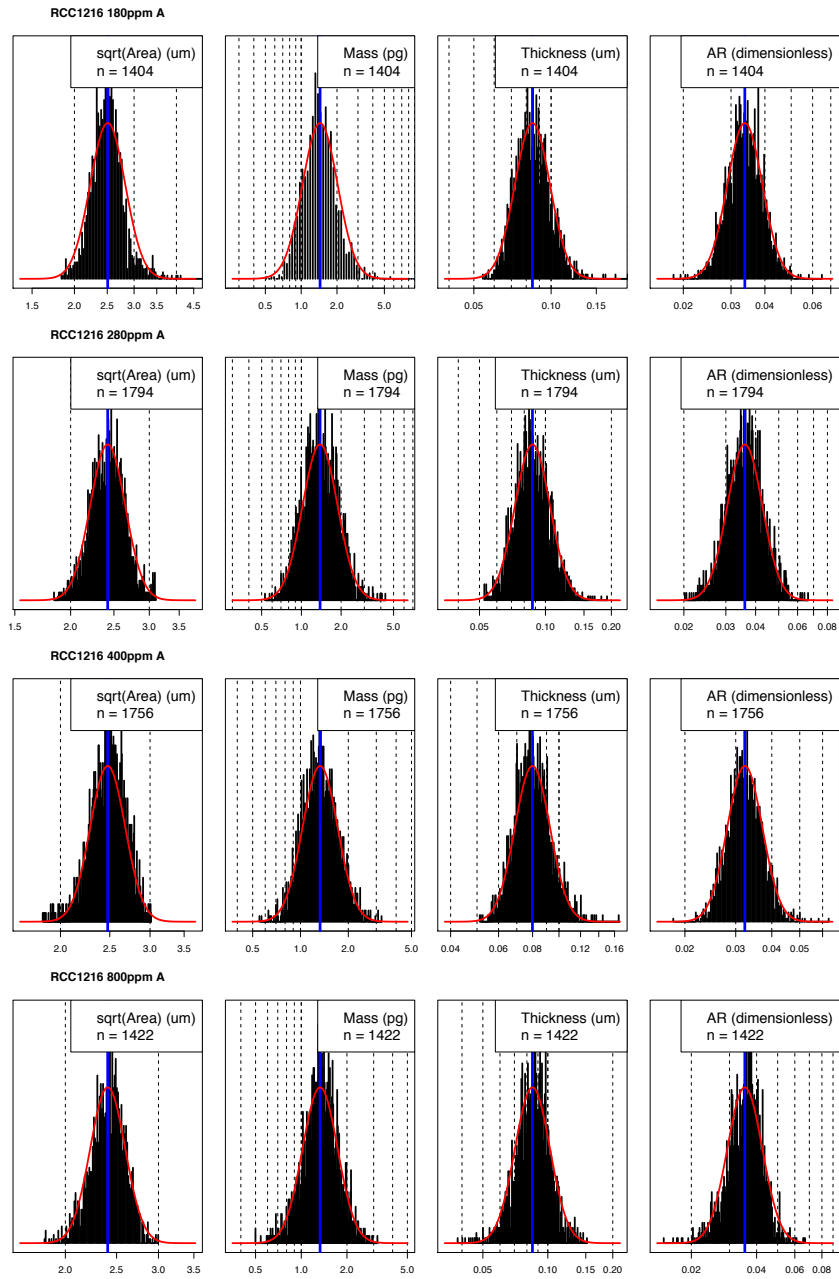

Figure 4: S4: Histograms (2)



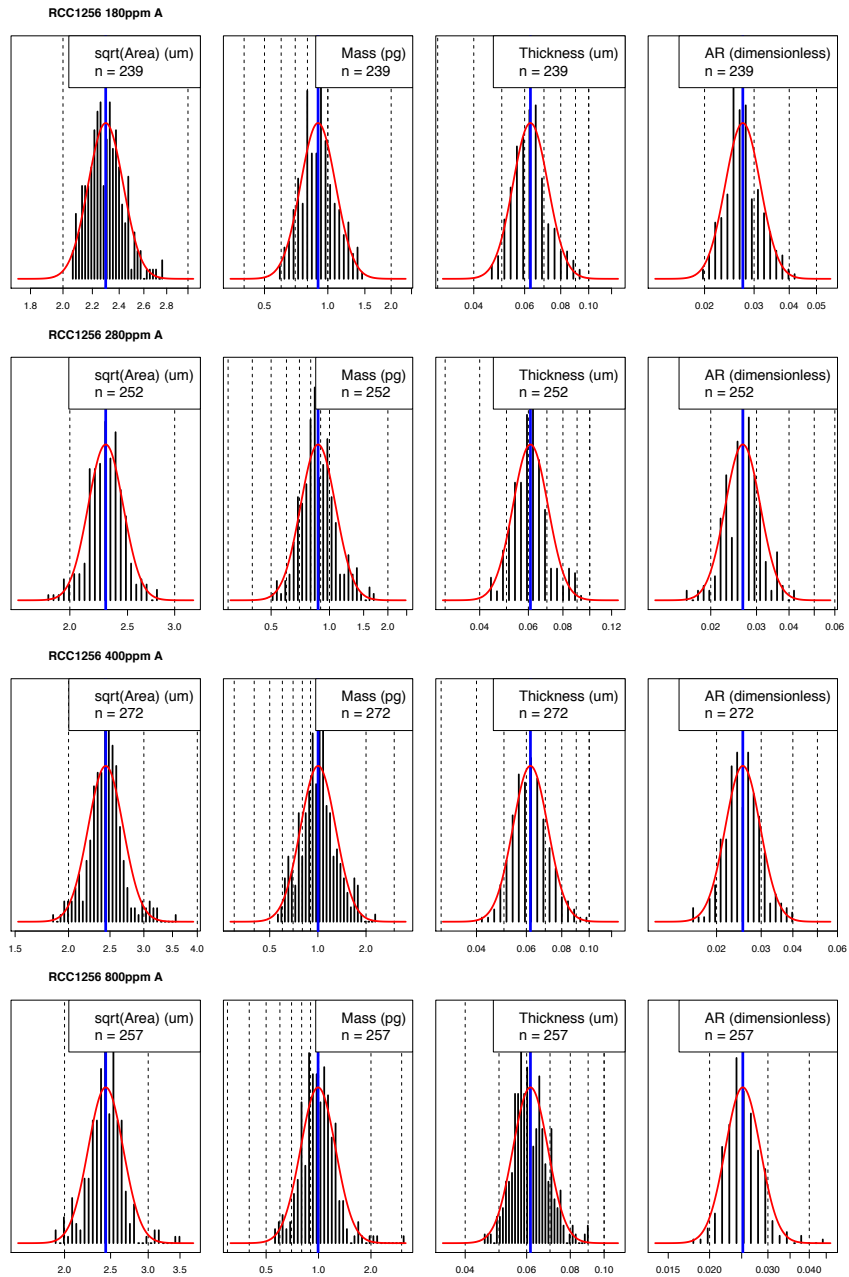

Figure 5: S5: Histograms (3)

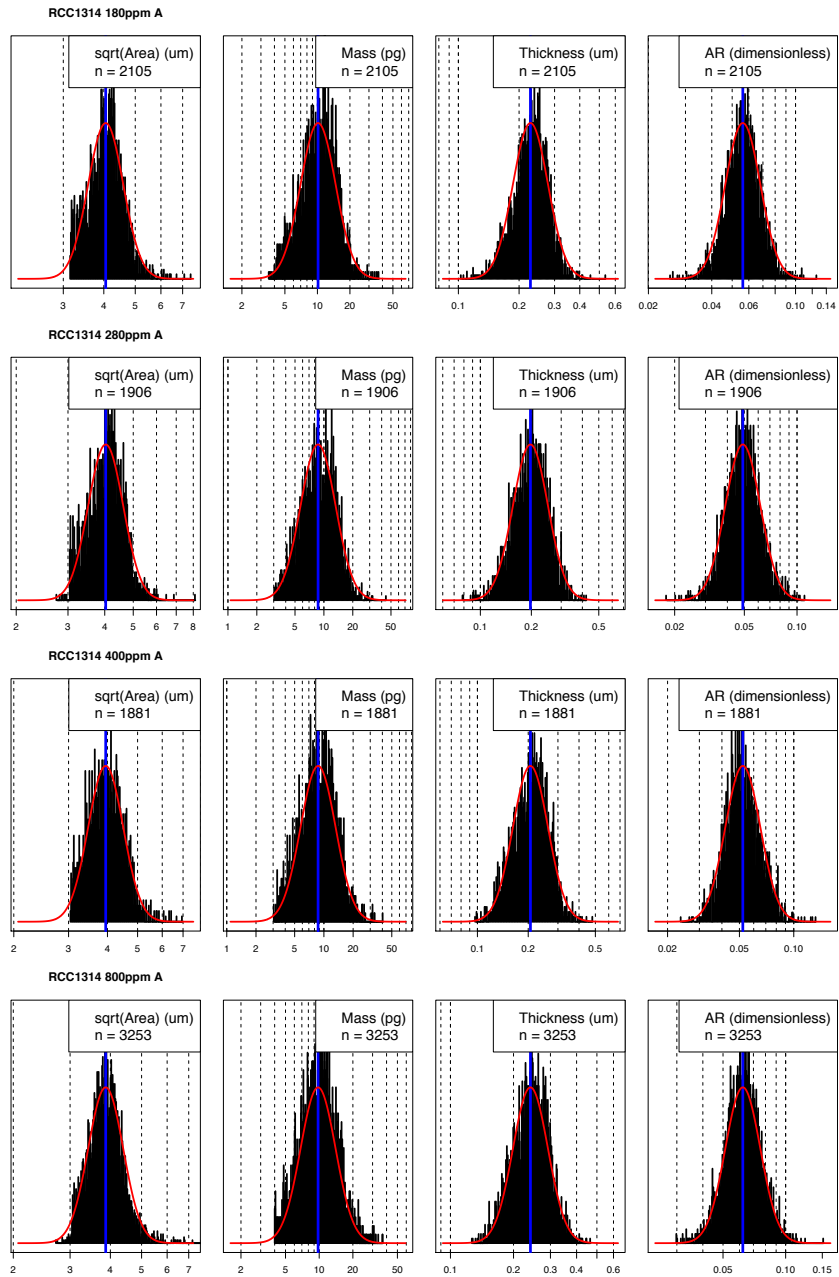

Figure 6: S6: Histograms (4)

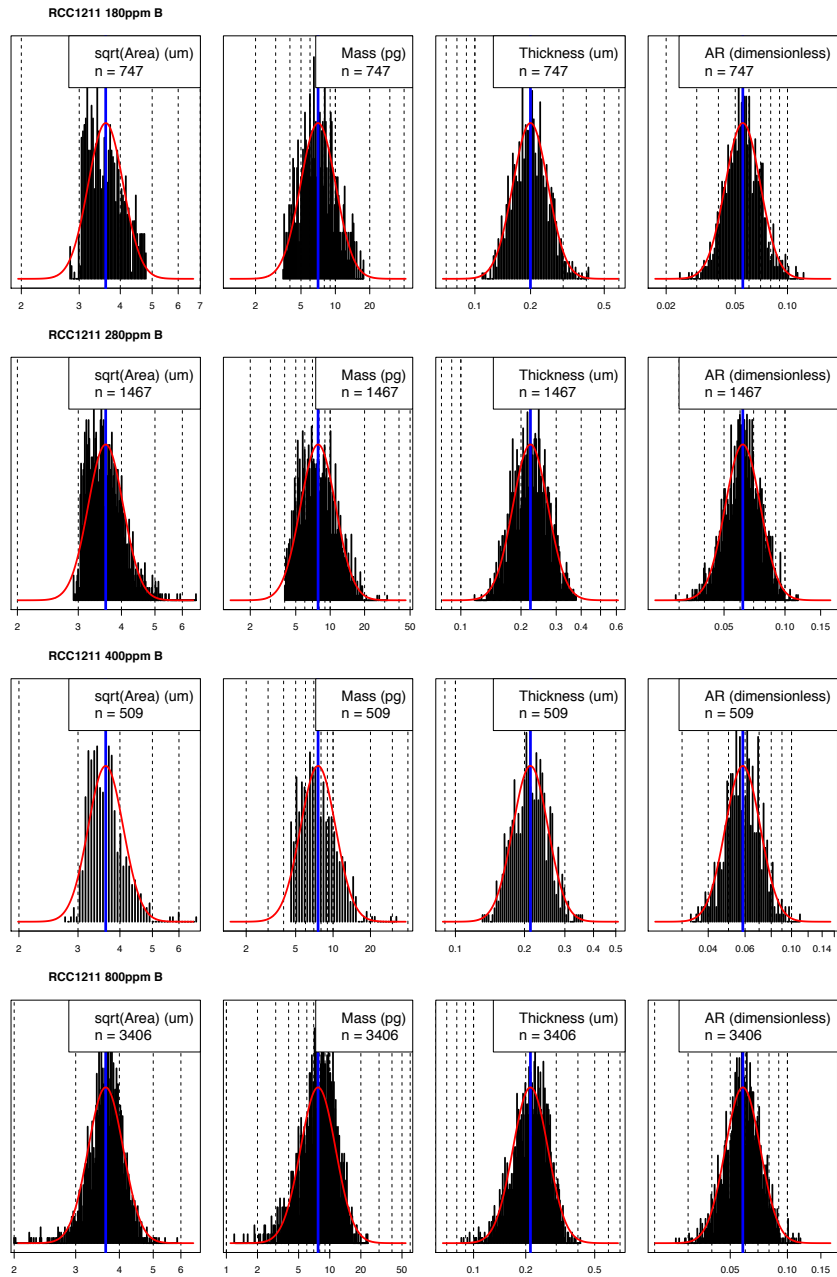

Figure 7: S7: Histograms (5)

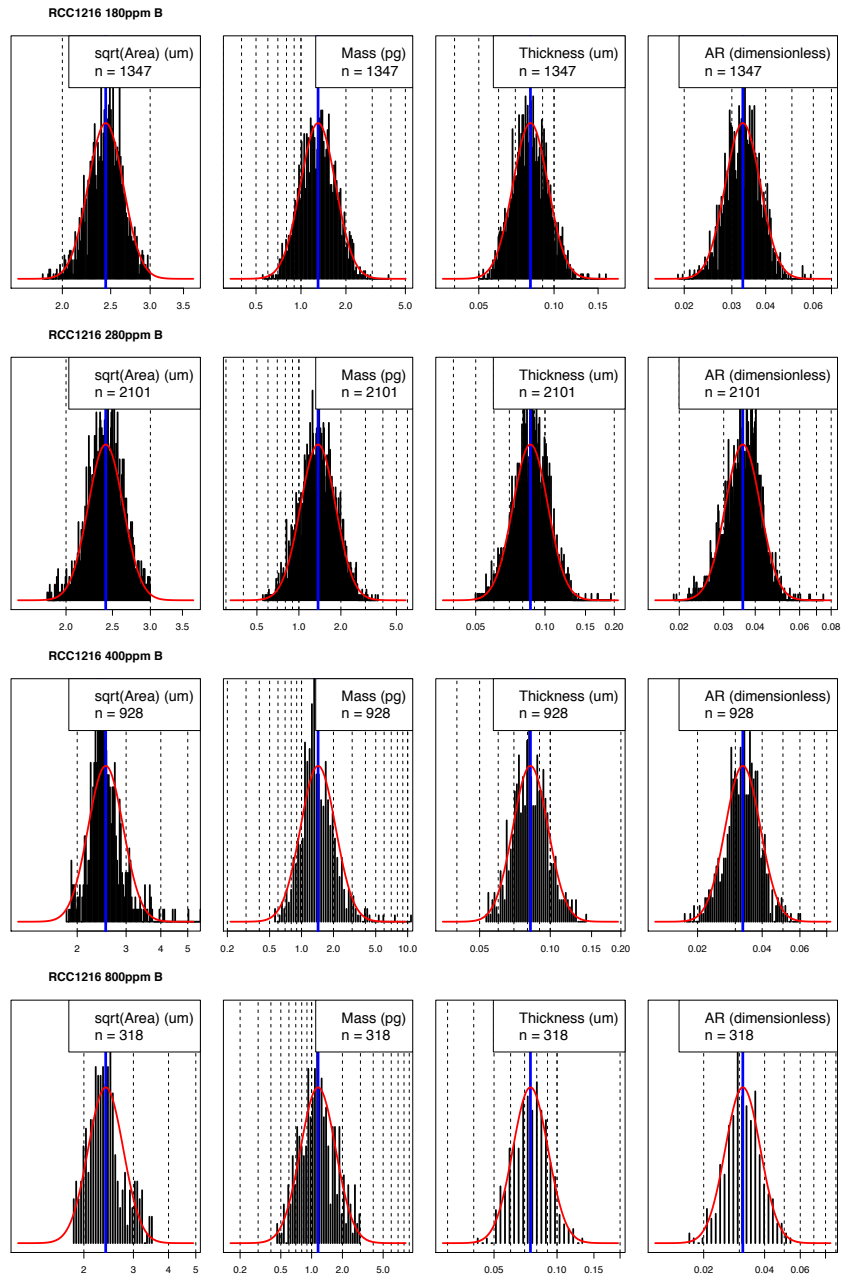

Figure 8: S8: Histograms (6)

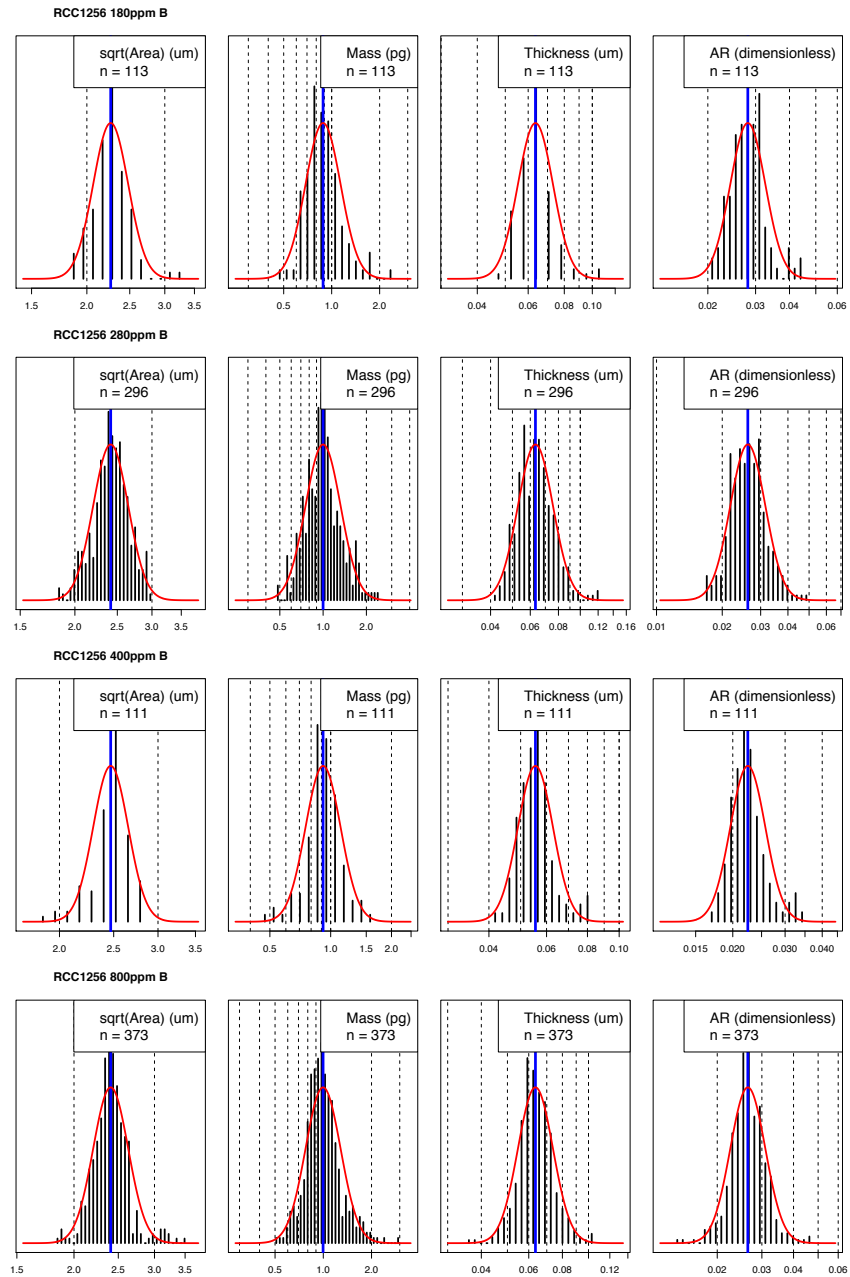

Figure 9: S9: Histograms (7)

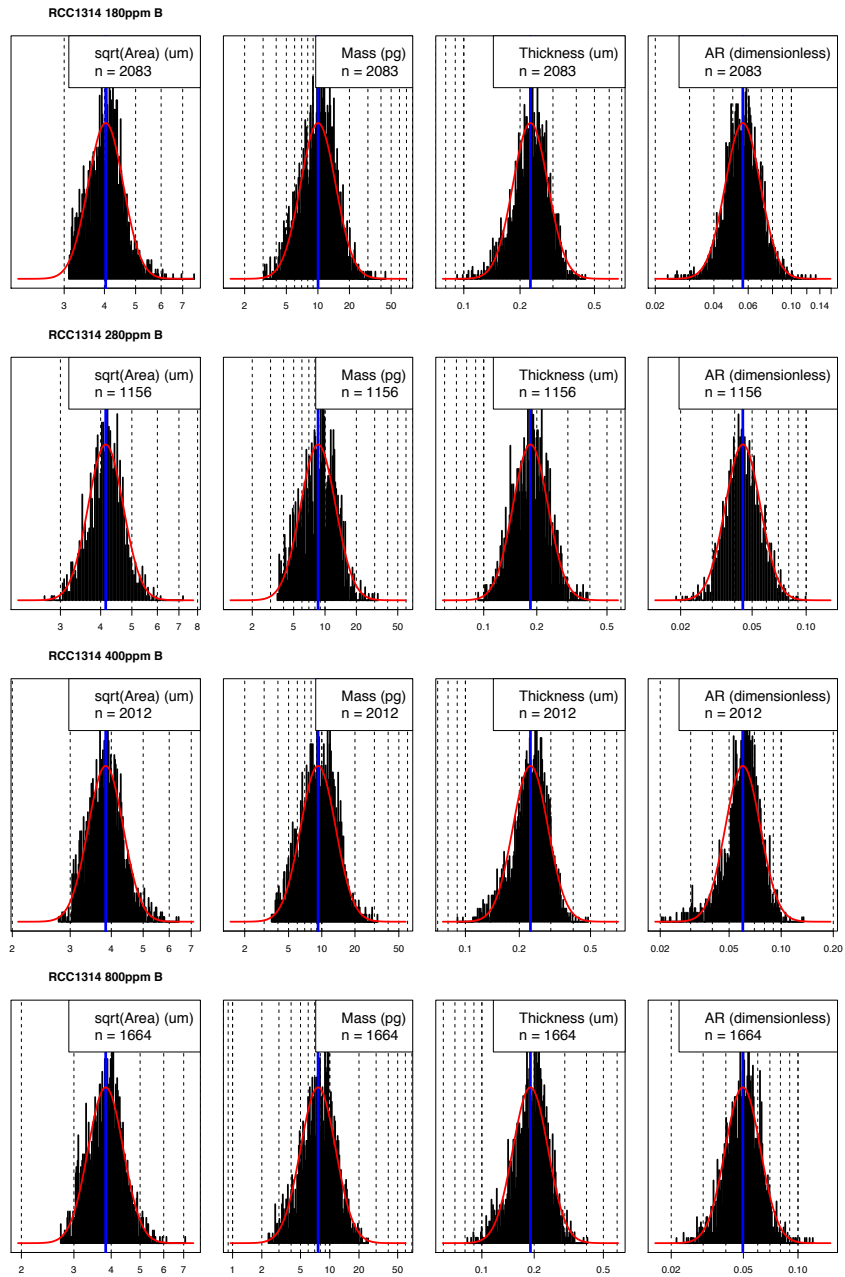

Figure 10: S10: Histograms (8)

## 53 Supplementary references

## 54 References

- 55 Bach, Lennart Thomas, Riebesell, Ulf, & Georg Schulz, Kai. 2011. Distinguishing between the  
56 effects of ocean acidification and ocean carbonation in the coccolithophore *Emiliana huxleyi*.  
57 *Limnology and oceanography*, **56**(6), 2040–2050.
- 58 Beaufort, L., Probert, I., de Garidel-Thoron, T., Bendif, E. M., Ruiz-Pino, D., Metzl, N., Goyet,  
59 C., Buchet, N., Coupel, P., Grelaud, M., Rost, B., Rickaby, R. E. M., & de Vargas, C. 2011.  
60 Sensitivity of coccolithophores to carbonate chemistry and ocean acidification. *Nature*, **476**(7358),  
61 80–83.
- 62 Beaufort, Luc, Barbarin, Nicolas, & Gally, Yves. 2014. Optical measurements to determine the  
63 thickness of calcite crystals and the mass of thin carbonate particles such as coccoliths. *Nature*  
64 *protocols*, **9**(3), 633–42.
- 65 Elderfield, H, Ferretti, P, & Greaves, M. 2012. Evolution of Ocean Temperature and Ice Volume  
66 Through the Mid-Pleistocene Climate Transition. *Science*, **704**(2012).
- 67 Henderiks, Jorijntje. 2008. Coccolithophore size rules Reconstructing ancient cell geometry and  
68 cellular calcite quota from fossil coccoliths. *Marine micropaleontology*, **67**(1-2), 143–154.
- 69 Iglesias-Rodriguez, M Debora, Halloran, Paul R, Rickaby, Rosalind E M, Hall, Ian R, Colmenero-  
70 Hidalgo, Elena, Gittins, John R, Green, Darryl R H, Tyrrell, Toby, Gibbs, Samantha J, von  
71 Dassow, Peter, Rehm, Eric, Armbrust, E Virginia, & Boessenkool, Karin P. 2008. Phytoplankton  
72 calcification in a high-CO<sub>2</sub> world. *Science (new york, n.y.)*, **320**(5874), 336–40.
- 73 Langer, G., Nehrke, G., Probert, I., Ly, J., & Ziveri, P. 2009. Strain-specific responses of *Emiliana*  
74 *huxleyi* to changing seawater carbonate chemistry. *Biogeosciences*, **6**(11), 2637–2646.

- 75 Lüthi, Dieter, Le Floch, Martine, Bereiter, Bernhard, Blunier, Thomas, Barnola, Jean-Marc, Siegen-  
76 thaler, Urs, Raynaud, Dominique, Jouzel, Jean, Fischer, Hubertus, Kawamura, Kenji, & Stocker,  
77 Thomas F. 2008. High-resolution carbon dioxide concentration record 650,000-800,000 years  
78 before present. *Nature*, **453**(7193), 379–82.
- 79 Meier, K. J. S., Beaufort, L., Heussner, S., & Ziveri, P. 2014a. The role of ocean acidification in  
80 *Emiliana huxleyi* coccolith thinning in the Mediterranean Sea. *Biogeosciences*, **11**(10), 2857–  
81 2869.
- 82 Meier, K.J.S., Berger, C., & Kinkel, H. 2014b. Increasing coccolith calcification during CO<sub>2</sub> rise of  
83 the penultimate deglaciation (Termination II). *Marine micropaleontology*, **112**(July), 1–12.
- 84 Müller, M. N., Schulz, K. G., & Riebesell, U. 2010. Effects of long-term high CO<sub>2</sub> exposure on two  
85 species of coccolithophores. *Biogeosciences*, **7**(3), 1109–1116.
- 86 Parrenin, F, Barnola, J, Beer, J, Blunier, T, Castellano, E, Chappellaz, J, Dreyfus, G, Fischer, H,  
87 & Fujita, S. 2007. of the Past The EDC3 chronology for the EPICA Dome C ice core. 485–497.
- 88 Rickaby, R. E. M., Henderiks, J., & Young, J. N. 2010. Perturbing phytoplankton: response and  
89 isotopic fractionation with changing carbonate chemistry in two coccolithophore species. *Climate*  
90 *of the past*, **6**(6), 771–785.
- 91 Riebesell, Ulf, Zondervan, Ingrid, Rost, B.È., Tortell, P.D., Zeebe, R.E., & Morel, F.È.M.M. 2000.  
92 Reduced calcification of marine plankton in response to increased atmospheric CO<sub>2</sub>. *Nature*,  
93 **407**(September), 2–5.
- 94 Sett, Scarlett, Bach, Lennart T, Schulz, Kai G, Koch-Klavsen, Signe, Lebrato, Mario, & Riebesell,  
95 Ulf. 2014. Temperature Modulates Coccolithophorid Sensitivity of Growth, Photosynthesis and  
96 Calcification to Increasing Seawater pCO<sub>2</sub>. *Plos one*, **9**(2), e88308.
- 97 Young, Jeremy R., & Ziveri, Patrizia. 2000. Calculation of coccolith volume and it use in calibration



98 of carbonate flux estimates. *Deep sea research part ii: Topical studies in oceanography*, **47**(9-11),  
99 1679–1700.

100 Zondervan, I., Zeebe, R.E., Rost, B., & Riebesell, U. 2001. Decreasing marine biogenic calcification:  
101 A negative feedback. *Global biogeochemical cycles*, **15**(2), 507–516.
